# Supplementary material
Source: Springer Nature journal article supplement (https://www.springermedizin.de/resource/supplementary/12967_2010_715_MOESM3_ESM.pdf/9577336)
Supplement: MOESM3 [file 9577336]

**FIGURE 3A: correlation between neopterin levels and disease progression**

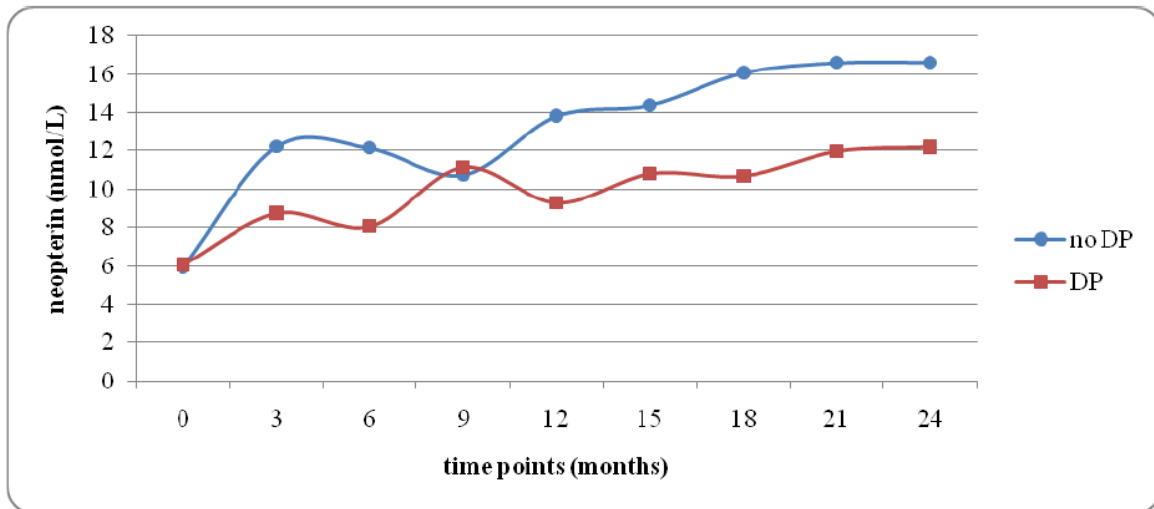

**FIGURE 3B: correlation between kyn/trlp ratio and disease progression**

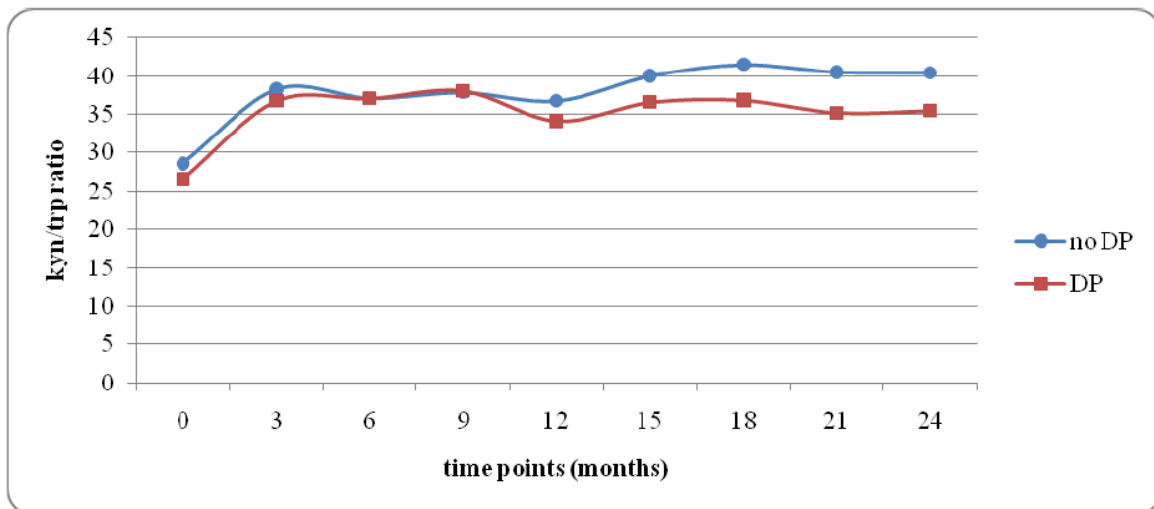

**Figure 3 (A and B):** No significant correlation was present between neopterin levels (A) or kyn/trlp ratio (B) and disease progression at any of the examined time points. Disease progression consisted of more than 1 point for EDSS between 0 and 5.5 and more than 0.5 point for EDSS  $\geq$ 5.5 during the treatment period (TP); DP: disease progression.
